1 **Hydrodynamics of the frontal strike in aquatic snakes: drag, added mass and the**  
2 **possible consequences for prey capture success.**

3 Marion Segall\*<sup>1,2,3</sup>, Anthony Herrel<sup>1,4</sup> and Ramiro Godoy-Diana<sup>2</sup>.

4 1. UMR CNRS/MNHN 7179, « Mécanismes adaptatifs et Evolution », 55 Rue Buffon,  
5 75005, Paris, France.

6 2. Laboratoire de Physique et Mécanique des Milieux Hétérogènes (PMMH), UMR  
7 CNRS 7636 ; ESPCI Paris, PSL Research University, Sorbonne Université,  
8 Université Paris Diderot, 75005 Paris, France.

9 3. Department of Herpetology, American Museum of Natural History, Central Park  
10 West at 79th Street, New York, NY 10024.

11 4. Evolutionary Morphology of Vertebrates, Ghent University, K.L. Ledeganckstraat  
12 35, B-9000 Ghent, Belgium.

13 Corresponding author: Marion Segall, [marion.segall@live.fr](mailto:marion.segall@live.fr)

14 **Running title:** Hydrodynamics of snake prey capture

15 **Summary statement:** The present work explores the functional implications of head shape  
16 in a group of aquatic predators using a fluid mechanics approach.

17 **Abstract**

18           Natural selection favors organisms that are the most successful in fitness-related  
19 behaviors such as foraging. Secondary adaptations pose the problem of re-adapting an  
20 already 'optimized' phenotype to new constraints. When animals forage underwater, they  
21 face strong physical constraints, particularly when capturing prey. Successful prey capture  
22 requires a predator to be fast and to generate a high acceleration. This involves two main  
23 constraints due to the surrounding fluid: drag and added mass. Both constraints are related  
24 to the shape of the animal. We experimentally explore the relationship between shape and  
25 performance in the context of an aquatic snake strike. As a model, we use two different 3D-  
26 printed snake heads representing typical shapes of aquatically-foraging and non-aquatically-  
27 foraging snakes, and frontal strike kinematics based on *in vivo* observations. By using direct  
28 force measurements, we compare the drag and added mass faced by the aquatic and non-  
29 aquatic snake models during a strike. Our results show that both drag and added mass are  
30 optimized in aquatic snakes. Using flow field measurements with particle image  
31 velocimetry, we examine the fluid dynamical mechanisms that could be behind the reduction  
32 of hydrodynamic constraints observed for the aquatic snake head shape, which makes it well  
33 suited to capture prey under water.

34 **Key words:** snakes, fluid mechanics, forces, morphology, prey capture

## 35 **Introduction**

36 Aquatic animals have to overcome the strong viscous and inertial constraints  
37 associated with underwater movement <sup>1</sup>. Physically, these constraints are related to the  
38 kinematics of movement and the morphology of an animal (i.e. the shape of the object that  
39 is facing the flow). For most aquatic vertebrates, viscous effects are confined to a thin  
40 boundary layer surrounding the body, which couples the motion of the animal with that of  
41 the surrounding fluid and gives rise to the skin friction that penalizes aquatic locomotion. In  
42 addition, fluid inertia causes the boundary layer to separate from the animal's body, creating  
43 the recirculation zones associated to pressure drag <sup>2</sup>. The specifics of the flow separation  
44 determine the relative importance of pressure to skin friction drag <sup>3,4</sup>. In addition to drag,  
45 which depends on the velocity of the animal, the hydrodynamics are also dependent on  
46 acceleration of the added mass <sup>5,6</sup>. This corresponds to the mass of fluid that is accelerated  
47 together with the animal and which exerts a reaction force. Both drag and added mass depend  
48 on the size and shape of the body <sup>5</sup>, and it can thus be expected that the morphology of  
49 aquatic animals has evolved to reduce drag and added mass. However, organisms have a  
50 morphology that is also constrained by evolutionary history, functional trade-offs, and  
51 developmental programs thus restricting the range of possible morphological adaptations.  
52 Environmental and biological constraints act simultaneously on an organism and may all  
53 impact their evolution, sometimes leading to convergent phenotypes <sup>7-10</sup>. Morphological  
54 convergence is common across the animal kingdom, yet its impact on function has only  
55 rarely been tested <sup>11-15</sup>. We here use the case of convergence in head shape in aquatic snakes  
56 <sup>16</sup> to provide an experimental test of the suggested functional advantages of observed  
57 similarities in the head shape of aquatic snakes.

58 Snakes are an ideal model to study convergence as they have invaded the aquatic  
59 medium multiple times independently throughout their evolutionary history. However, they  
60 do not show any of the usual adaptations to aquatic prey capture (e.g. they cannot perform  
61 suction feeding due to their reduced hyoid <sup>14</sup>). Snakes have to deal with the hydrodynamic  
62 constraints when capturing a prey, and as these constraints are related with the shape <sup>1,13,17</sup>,  
63 the head of aquatically foraging snakes should have evolved in a way to minimize the  
64 constraints. Convergence in head shape in aquatic snakes has been demonstrated previously  
65 <sup>14-16,18,19</sup>. In a previous work <sup>16</sup>, we compared the head shape of 62 species of snakes that  
66 capture prey under water (from sea snakes over homalopsids to North American  
67 watersnakes) versus 21 phylogenetically closely related species that do not forage under

68 water. We used 3D geometric morphometrics on surface scans of these species and ran  
69 phylogenetic analyses demonstrating a morphological convergence in head shape of  
70 aquatically foraging snakes. Moreover, we characterized the shapes that are specific of both  
71 group of snakes (i.e. the aquatic and the non-aquatic foragers). We hypothesized that the  
72 convergent shape would provide a hydrodynamic advantage to aquatic foragers in  
73 comparison with their close relatives that do not capture aquatic prey. Several previous  
74 studies similarly have suggested convergence to give rise to a functional advantage<sup>13,14,16,20</sup>,  
75 yet this has never been tested experimentally. Thus, we here propose an experiment to test  
76 this idea. In other words, we investigate whether the head shape associated with aquatically  
77 foraging snakes has a hydrodynamic advantage over the shape associated with the non-  
78 aquatic foragers. The hydrodynamic constraints involved during a strike are the pressure  
79 drag – skin friction being negligible in the regimes of interest here<sup>11</sup> – and the added mass.  
80 Both of these constraints are related to a certain extent to the shape of the object that is  
81 moving through a fluid<sup>5,6</sup>. Thus, if our hypothesis is correct, the shape corresponding to the  
82 aquatic forager should show less drag and added mass than the non-aquatic model.

83 Another constraint related to the capture of prey under water is the  
84 mechanosensitivity of aquatic prey like fish. The lateral line system of fish is composed of  
85 mechanoreceptors that can detect very small pressure variations with an estimated threshold  
86 of 0.1 to 1 mPa at 1 mm<sup>21,22</sup>. This system triggers a reflex escape response in the prey once  
87 a pressure threshold has been reached. Previous studies have suggested that a snake moving  
88 underwater generates a bow wave that might be able to trigger the reflex response of the prey  
89<sup>11,14</sup>. We tested this hypothesis and predicted that aquatic snakes should be stealthier than  
90 non-aquatic snakes during the strike such that the detection of the predator by the prey would  
91 be delayed.

92 We use direct force measurements on two 3D printed models of snake heads derived  
93 from our previous work based on the comparison of 83 species of snakes<sup>16</sup> (i.e. more than  
94 400 snake specimens). As these models results from a 3D geometric morphometric analysis,  
95 the models are scaled to the same size, allowing us to specifically test for the impact of shape  
96 on hydrodynamic constraints. Our experimental setup mimics a ‘sit-and-wait’ frontal strike  
97 under water, meaning that the model remains motionless before the strike and is then  
98 suddenly accelerated to reach an almost constant speed for a short time. We compared  
99 models with the mouth open, as aquatic snakes keep their mouth opened during frontal  
100 strikes (Fabre et al., 2016; van Netten, 2006; Vincent et al., 2009, Herrel and Segall pers

101 obs.). The force applied to the head during the strike was recorded to characterize the added  
102 mass and drag, which determine the hydrodynamic efficiency of a strike. In addition, another  
103 sensor was placed at the end of the strike track to assess the distance at which a prey is likely  
104 to detect the presence of the snake during capture. Particle Image Velocimetry (PIV) was  
105 used to visualize the flow field around the head during a strike. We also characterized the  
106 evolution of the vortex intensity during a strike for each shape, as it is closely related to the  
107 hydrodynamic forces generated by a moving object<sup>23–25</sup>.

## 108 **Material & Methods**

### 109 *3D models*

110 We compared two models that we termed “aquatic” and “non-aquatic” (Fig. 1). These  
111 shapes result from a 3D geometric morphometric study showing that the head shape of  
112 aquatic snake species has converged, possibly in response to the hydrodynamic constraints  
113 involved during prey capture under water<sup>16</sup>. We compared the hydrodynamic forces that are  
114 exerted on each of the head shapes during a simulated capture event. The geometric  
115 morphometric analysis allows to extract shapes independent of variation of size such that the  
116 shapes are directly comparable to one another. In a next step we opened the mouth of the  
117 models as snake use to attack their prey with the mouth open. We used Blender™ to rotate  
118 the jaw and the top of the head to reach an angle of 70° based on previously published data  
119 on frontal strikes in snakes<sup>14,26,27</sup>. The two models were then 3D printed using a Stratasys  
120 Fortus 250 MC 3D printer with ABS P430 as a material (Fig. 2a.).

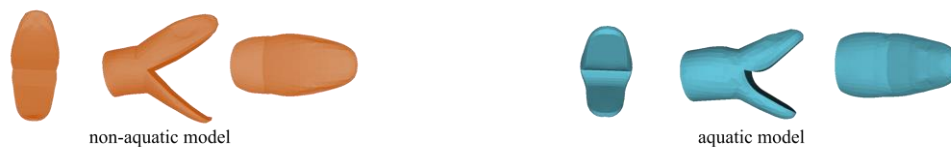

121

122 **Figure 1: 3D models of the head shape of non-aquatic (left) versus aquatic snakes (right)**  
123 **in front, side and top view.**

### 124 *Experimental setup*

125 Snakes capture their prey using high acceleration forward motions that we mimicked  
126 using springs (Fig. 2a). We generated a range of speeds and accelerations by applying a  
127 different compression on the spring. We used a force sensor FUTEK LSB210+/-2 Lb to

128 record the force exerted on the models which were positioned horizontally inside a water  
129 tank. This sensor was attached to the model using an aluminum rod and recorded the axial  
130 forces applied to the head during a strike. The other side of the sensor was attached to a  
131 bracket (sensor 1, Fig. 2a) that was itself hooked on the movable part of an air-bearing rail  
132 that allows the system to remain frictionless. This movable part was compressed against the  
133 spring and suddenly released. The length of the path was 20cm. Approximately 60 trials (i.e.  
134 spring compressions) were done for each model. To obtain the kinematics of each strike, we  
135 recorded the position of the movable part using a position sensor (optoNCDT1420, Micro-  
136 Epsilon) (Fig. 2a).

137 In addition, we wanted to assess what a prey would sense in terms of pressure, so we  
138 placed another, more sensitive, force sensor (FUTEK LSB210 100 g) at the end of the path  
139 to which we attached a round plastic piece of diameter 7 cm that allowed us to record the  
140 pressure changes (sensor 2, Fig. 2a). This sensor provided information about the distance at  
141 which a prey could potentially detect the presence of a snake during a strike. The force and  
142 position sensors were synchronized, and data were recorded at 1 kHz.

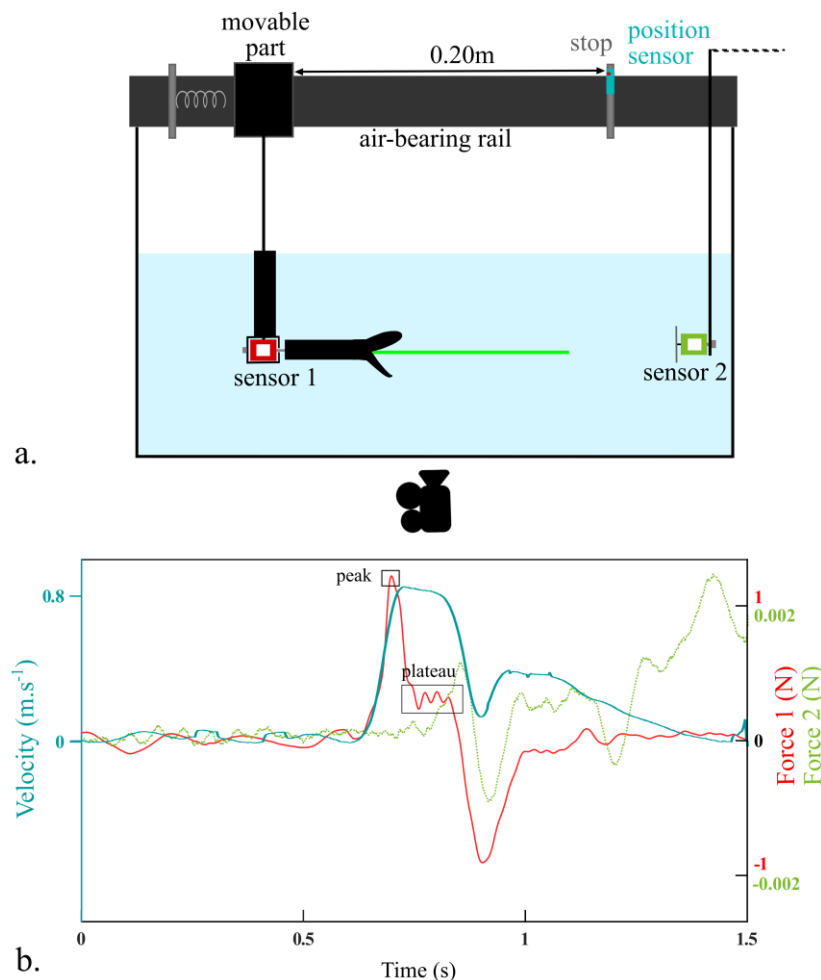

143

144 **Figure 2: a. Experimental setup used to simulate a frontal attack of a snake towards a**  
145 **prey. b. Example of the output of the force sensor 1 (red line), force sensor 2 (green dashed**  
146 **line) and velocity (blue line) during one trial (i.e. one strike). The plateau and peak force**  
147 **used to calculate the hydrodynamic forces are indicated.**

148 *Drag coefficient and added mass*

149 The first part of the strike is the acceleration phase during which the velocity  
150 increases. This phase corresponds to the decompression of the spring. It is correlated with a  
151 dramatic increase in the force that is applied to the snake head model (red line, sensor 1, Fig.  
152 2). Once the springs are completely decompressed, the system is no longer accelerating, and  
153 the velocity decreases slowly. In parallel, the force applied to the model decreases until it  
154 reaches a plateau-like phase (Fig. 2b). Then, the system hits the stop at the end of the track  
155 and moves backward generating a large drop in both velocity and force signaling the end of  
156 the trial.

157 During the plateau phase (Fig. 2b), the only force that is applied to the model and  
158 thus, the only force that is recorded by the sensor is the drag force. Thus, we used the average  
159 force recorded during this phase ( $F_d$ ) to calculate the drag coefficient ( $C_d$ ) of both of our  
160 models by using the standard definition <sup>2</sup>:

161 
$$C_d = \frac{2F_d}{\rho U^2 S} \quad (1)$$

162 where  $F_d$  is the drag force,  $\rho$  is the density of water,  $U$  the velocity of the object and  $S$  its  
163 projected frontal surface area, which was measured at 12.89 cm<sup>2</sup> for the aquatic model and  
164 14.72 cm<sup>2</sup> for the non-aquatic model. The term  $2F_d/\rho S$  was plotted against  $U^2$  and the linear  
165 regression coefficient corresponds to the drag coefficient of the models (Fig. 3). The  
166 Reynolds number range of our experiments is  $1.10^4$ - $7.10^4$ .

167 During the acceleration phase, both drag and inertial forces are at play, meaning that  
168 the peak force ( $F_{\text{peak}}$ , Fig. 2b) recorded by the force sensor is composed of these two forces.  
169 To calculate the added mass generated by both models, we used the following calculation  
170 steps for each trial, we first calculated the inertial force by subtracting the instantaneous drag  
171 force from the peak force measured by the sensor:

172 
$$F_i = F_{\text{peak}} - F_{d(t1)} \quad (2)$$

173 where  $F_i$  is the inertial force applied to the model and  $F_{d(t)}$  is the instantaneous drag force  
174 when the acceleration reaches its maximum:

$$175 \quad F_{d(t_1)} = \frac{1}{2} \rho U_{(t_1)}^2 C_d S \quad (3)$$

176 Here  $\rho$  is the density of water,  $U_{(t_1)}$  the velocity at the instant the acceleration is maximal  
177 and  $S$  the projected frontal surface area of each model. Now, the added mass  $M$  can be  
178 computed as:

$$179 \quad M = \frac{F_i - ma}{a} \quad (4)$$

180 where  $m$  is the mass of the object, and  $a$  the acceleration.

181 Finally, the added mass coefficient ( $C_a$ )<sup>2</sup>:

$$182 \quad C_a = \frac{M}{\rho V} \quad (5)$$

183 where  $V$  is the volume of the model:  $7.33 \cdot 10^{-5} \text{ m}^3$  for the aquatic model and  $5.78 \cdot 10^{-5} \text{ m}^3$  for  
184 the non-aquatic model.

185 The added mass coefficient was obtained by plotting the added mass term  $(F_i - ma)/\rho V$ ,  
186 against the acceleration ( $a$ ). The linear regression coefficient corresponds to the added mass  
187 coefficient of the models (Fig. 4).

### 188 *Detection distance*

189 To compare the effect of the head shape on the detection by a possible prey we used  
190 the output of the second force sensor (sensor 2, Fig. 2a). This sensor can detect pressure  
191 variations of approximately 0.3 Pa which is around the hearing and the startle threshold of  
192 some fish (i.e. between 0.01Pa and 0.56Pa)<sup>28,29</sup>. To estimate the position at which the prey  
193 could detect the predator, we defined the detection distance  $d$  as the position at which the  
194 force detected by sensor 2 deviates from the unperturbed value by more than one standard  
195 deviation of the sensor output before the strike (green dashed line, Fig 2b, Fig. 5).

### 196 *Particle Image Velocimetry*

197 We used 2D Particle Image Velocimetry (PIV) with a high-speed camera, Dantec  
198 Dynamics SpeedSense M, to obtain a time-resolved recording of the strike from the bottom



199 of the tank (Fig. 2a.). Water was seeded with polyamid particles of 20  $\mu\text{m}$  in diameter and a  
200 Quantronix® Darwin-Duo laser was used to produce the light sheet. Image acquisition was  
201 performed at 733Hz. We choose to record three different planes on each head to obtain a  
202 complete picture of the fluid flow around the head during the attack (see Supplementary Fig.  
203 S1). We applied the same compression to the springs (i.e. maximal compression) to get an  
204 equivalent comparison for the different shapes. Acquisition was performed using the Dantec  
205 DynamicStudio 2015a software. The PIV vector computation was performed using LaVision  
206 7.2 with a 16 x 16 pixel<sup>2</sup> interrogation window and 50% overlap. Additional post-processing  
207 and analysis was done in Matlab using the PIVMat toolbox<sup>30</sup>. A more quantitative analysis  
208 was performed by computing the overall primary circulation  $\Gamma = \int \omega^+ dA$  in each PIV plane  
209 ( $\omega^+$  being the positive vorticity in Fig. 6b.). The evolution of the dimensionless circulation  
210  $\Gamma/UL$  as a function of time, where L is the characteristic length scale of the acceleration  
211 regime of the strike maneuver (which is constant for all experiments) and  $U$  is the velocity  
212 of the strike is plotted in Fig. 6b.

### 213 *Statistical analyses*

214 To test for differences between the drag coefficients of the two shapes, we ran a  
215 Pearson correlation on the force component of the drag coefficient ( $2F_d/\rho S$ ) with the square  
216 velocity ( $U^2$ ). An ANCOVA with mass as a co-variate was performed to test for statistical  
217 differences in the drag coefficient between the two models. To compare the detection  
218 distance, we ran an ANCOVA with the distance as the response variable, the model as a  
219 factor, and the velocity as covariate. All the variables were Log<sub>10</sub>-transformed and the  
220 statistical analyses were performed using R<sup>31</sup>. The significance level was set at 5%.

## 221 **Results**

### 222 *Drag and added mass*

223 The drag coefficient of the non-aquatic shape is higher than the coefficient of the  
224 aquatic model, respectively 0.64 and 0.26 (Pearson's correlation: nonaq:  $df = 67$ ,  $P < 0.001$ ,  
225  $R^2 = 0.996$ ; aq:  $df=64$ ,  $P < 0.001$ ,  $R^2 = 0.995$ ; ANCOVA:  $F_{2,132} = 671.1$ ,  $P < 0.001$ ) (Fig. 3).

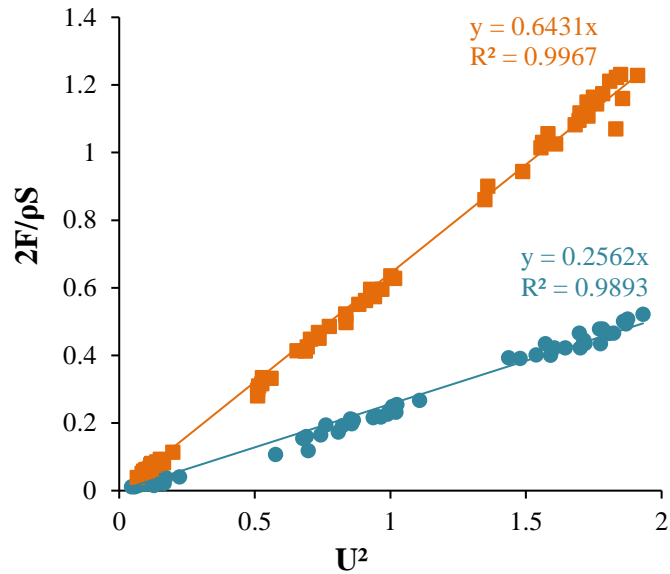

226

227 **Figure 3: Drag term  $2F_d/\rho S$  depending on the velocity term of the strike ( $U^2$ ) for the two**  
228 **head models tested. Linear regression lines are drawn. The slopes correspond to the drag**  
229 **coefficient of each shape and the  $R^2$  are the regression coefficients. Squares: non-aquatic**  
230 **model, circles: aquatic model.**

231 The mean added mass obtained is 12.67 g for the aquatic model versus 14.95 g for  
232 the non-aquatic model. The added mass coefficients obtained from the linear regression on  
233 Fig. 4 are 0.151 for the aquatic model and 0.235 for the non-aquatic model.

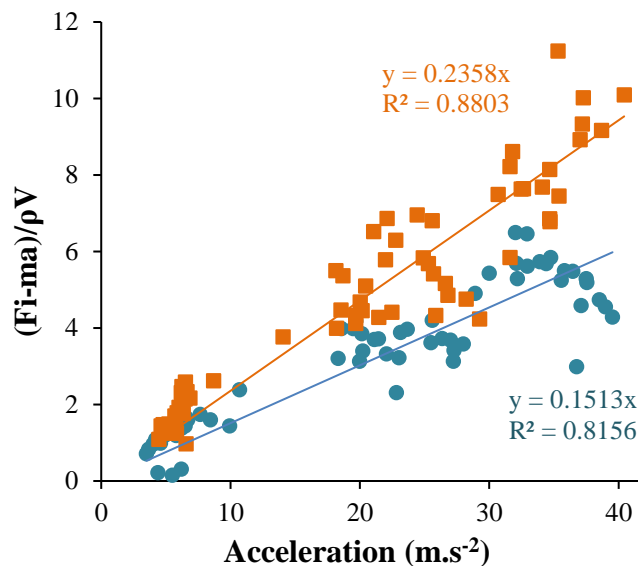

234

235 **Figure 4: Normalized inertial force term  $(F_i - ma)/\rho V$  depending on the acceleration of**  
236 **the strike ( $a$  in  $m.s^{-2}$ ) for the two head models tested. Linear regression lines are drawn.**

237 ***The slopes correspond to the added mass coefficient of each shape and the  $R^2$  are the***  
238 ***regression coefficients. Squares: non-aquatic model, circles: aquatic model.***

### 239 *Detection distance*

240 The force signal was too noisy to get any accurate measures of the detection distance  
241 at low velocities (i.e.  $U > 0.5 \text{ m}\cdot\text{s}^{-1}$ ). There is moreover no statistical difference between the  
242 distances at which the prey could detect the presence of the snake depending on their head  
243 shape. However, this distance depends on the maximal velocity of the strike, the faster the  
244 strike, the earlier the detection of the predator (ANCOVA:  $F_{2,84} = 5.05$ ;  $P = 0.008$ ; model:  $P$   
245  $= 0.65$ ;  $U_{\text{max}}$ :  $P = 0.008$ ) (Fig. 5).

246

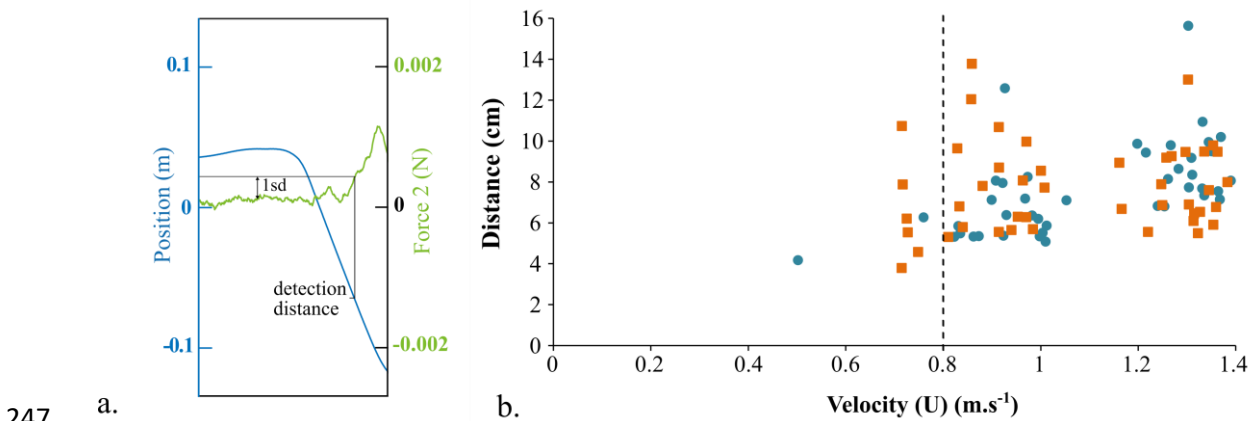

247 a.

b.

248 ***Figure 5: a. Zoom on the prey sensor output highlighting the method used to determine***  
249 ***the detection distance, using the 1sd (standard deviation) threshold (not at scale here). b.***  
250 ***Distance (cm) at which the prey could potentially detect the snake depending on the***  
251 ***maximal velocity of the strike ( $\text{m}\cdot\text{s}^{-1}$ ). For each graph: squares: non-aquatic model,***  
252 ***circles: aquatic model.***

### 253 *Flow characterization*

254 The frontal strike maneuver involves strong flow separations due to the high shear  
255 produced by the impulsive acceleration. The flow features can be characterized by  
256 examining the vortex structures formed at the corner of the mouth and on both tips of the  
257 jaw and of the skull. We created videos of the vortex formation during a strike, obtained  
258 from PIV in three planes around the snake heads (see Materials and Methods section), to  
259 compare both models (see Supplementary videos S2-4). The PIV measurements show the

260 formation of vortices during the strike maneuver. In Fig. 6a, we compare the vorticity field  
 261 at the end of the acceleration phase (at  $t \approx 0.8$  s) in the three measurement planes; bottom  
 262 view, jaw view, and skull view (Supplementary Fig. S1) for the aquatic and non-aquatic  
 263 heads. Looking at the bottom view, the advantage of the aquatic model seems to be related  
 264 to a smaller primary vortex. The picture is not as straightforward considering the jaw and  
 265 skull view, where opposite observations on the primary vorticity production can be observed  
 266 qualitatively: on the jaw view the primary vorticity patch appears more detached from the  
 267 jaw in the non-aquatic case, whereas in the skull view the same is true for the aquatic case.  
 268 Fig. 6b shows the quantitative analysis of the primary circulation. First, we can see that in  
 269 the bottom view the aquatic model induces a slightly ( $\sim 10\%$ ) lower overall circulation over  
 270 the whole acceleration phase. Second, for the jaw view it can be remarked that a much lower  
 271 overall circulation is produced by the vorticity detached from the tip of the jaw in the aquatic  
 272 case (around 40% of the non-aquatic value at the end of the acceleration phase). The picture  
 273 in the skull view is the opposite with the aquatic shape generating more overall circulation  
 274 but the difference between the two models is less important than for the jaw view. We note  
 275 also for the skull view that the computed value for the circulation is more variable.

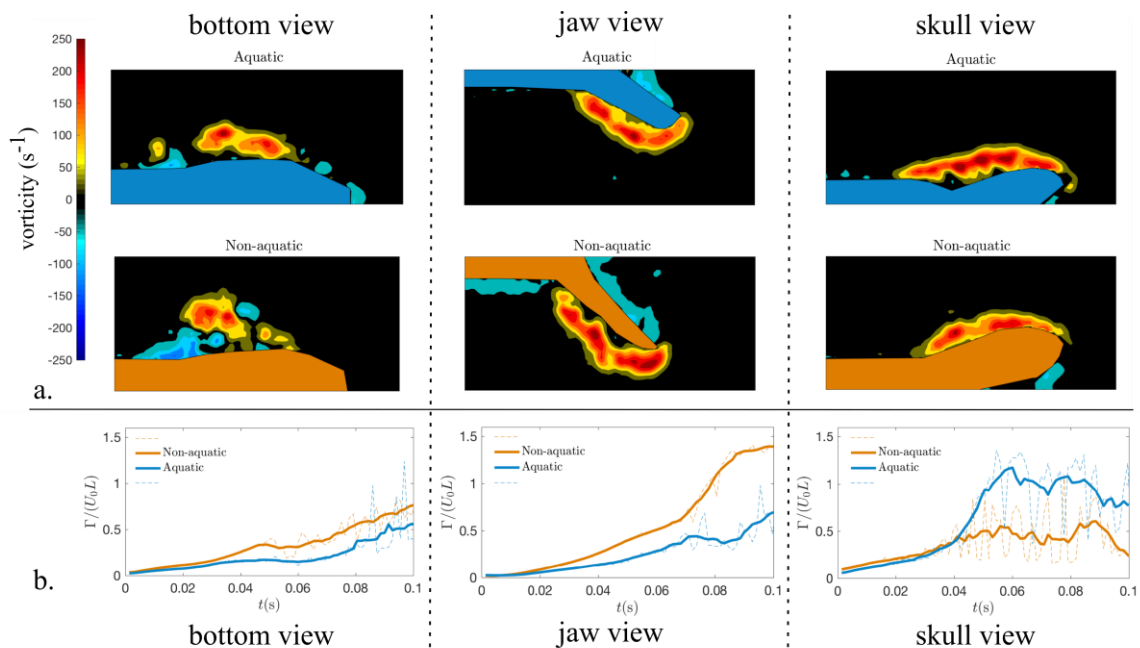

276

277 **Figure 6: a. Snapshots of the vorticity field  $\omega_z$  around the snake head models at the end**  
 278 **of the acceleration phase for the aquatic (first line) and non-aquatic (second line),**  
 279 **in the three measurement planes: bottom, jaw and skull views are shown on the first to**  
 280 **third columns, respectively. The color bar for the vorticity field is given in  $s^{-1}$ . b. Evolution**

281 *of the dimensionless integrated positive circulation during the acceleration phase*  
282 *depending on the time for both models in each of the three views considered.*

## 283 **Discussion**

284 Drag is well known for its importance during steady locomotion. However, it is also  
285 involved in transient behaviors such as the capture maneuver studied here. Certainly, the  
286 aquatic shape appears better adapted to capture aquatic prey using a frontal strike than the  
287 non-aquatic shape in terms of drag. The aquatic model has a drag coefficient that is almost  
288 3 times smaller than the non-aquatic model. As mentioned above, drag in this fast-impulsive  
289 maneuver is mainly pressure drag, which is intimately linked to the flow separation in the  
290 near wake of the snake head as it moves. The PIV measurements illustrate the vortices that  
291 are formed very early during the strike (see Supplementary videos S2-4). Looking at the  
292 bottom view in Fig. 6, the drag advantage of the aquatic model could be related to a smaller  
293 primary vortex, the non-aquatic case showing a more fluctuating and disordered flow field.  
294 Moreover, the vorticity produced at the tip of the jaw shows a clear quantitative difference  
295 and is consistently higher for the non-aquatic model. However, the skull view shows the  
296 opposite pattern of vorticity; the non-aquatic shape produces fewer vortices with an  
297 integrated primary circulation that is less important than for the aquatic model. It should be  
298 noted that the 2D nature of the PIV measurements presented here does not allow us to  
299 provide a quantitative link between drag and the vorticity profile of the flow around the head.  
300 Nonetheless, from the present results we can conjecture that a reduction of the recirculation  
301 bubble behind the jaw may be one of the main physical mechanisms explaining the physical  
302 advantage of the head shape observed in aquatically foraging snakes.

303 Transient maneuvers under water, such as the underwater prey capture in snakes,  
304 implicate an acceleration phase that not only involves drag but also inertia. Inertial forces  
305 under water are associated with the mass of the object but also with a mass of the fluid that  
306 is accelerated. Thus, the relationship between inertia and shape is not straightforward.  
307 However, some studies suggested that an optimal body shape for transient propulsion, such  
308 as a snake strike, would be an elongated, streamlined, and flexible body and non-muscle  
309 mass reduction, which corresponds to a snake-like configuration<sup>1,17</sup>. To our knowledge, no  
310 study to date has focused on the shape of the head and its role. In this study, we highlight  
311 that the hydrodynamic forces associated with a transient maneuver are important in  
312 comparison with drag (e.g. the peak of force in comparison with the plateau on Fig. 2).

313 Moreover, we demonstrated that the aquatic shape allows to reduce the added mass and is  
314 associated with a smaller added mass coefficient. This suggests that drag is not the only  
315 driver of the evolution of head shape in aquatic snakes. Moreover, added mass and drag  
316 optimization do not require divergent morphological features in the case of aquatic snake  
317 strikes, unlike what suggested for the body shape of fish <sup>17</sup>.

318       Regarding the prey detection distance, our results show that this distance does not  
319 depend on the snake head shape, but rather that it increases with strike velocity. However,  
320 we cannot conclude on the biological relevance of the absolute prey detection distance  
321 measured in our experiment as our setup was built with as primary purpose to measure drag  
322 and added mass. Snakes usually strike when the prey is close to their head (e.g. 0.5-0.8 cm  
323 for *Erpeton tentaculatum* <sup>32</sup>; 4.87 cm for *T. couchii*; 2.81 cm for *T. rufipunctatus* <sup>33</sup>; less than  
324 3 cm for *Hydrophis schistosus* <sup>34</sup>). The detection distance measured here is around 6 to 10  
325 cm, so we could consider that the prey can possibly detect the snake almost instantaneously  
326 upon the strike initiation, the reaction time of a fish being around 7 ms <sup>32</sup>. Capture success  
327 is thus more likely determined by the hydrodynamic profile of the snake head than being  
328 dependent on the reaction of the prey.

329       In conclusion, we investigated the role of head shape on the hydrodynamic forces  
330 generated by a predator using an experimental approach focusing on a transient maneuver.  
331 We were able here to quantify the role and impact of head shape in the hydrodynamics of  
332 prey capture in aquatic snakes. We highlighted a clear hydrodynamic advantage of the  
333 aquatic head shape when capturing a prey being associated not only with a smaller drag  
334 coefficient but also a smaller added mass coefficient. These results validate the hypothesis  
335 that the morphological convergence of the head shape in aquatic snakes is an adaptation to  
336 an aquatic lifestyle as it provides a clear hydrodynamic advantage. In this work, we focused  
337 on the shape of the head of aquatically foraging snakes, as several studies have highlighted  
338 convergence therein, and as shape plays a crucial role in the hydrodynamic constraints as  
339 well. Size could be an important feature regarding the hydrodynamic constraints. However,  
340 we did not detect any allometry in our morphological study, meaning that the aquatically  
341 foraging snakes are not significantly different in size than their closely related non-aquatic  
342 species. Thus, the present work focuses on the functional meaning of shape irrespective of  
343 size. The other factors that could play a role in the hydrodynamics of the prey capture of  
344 aquatic snakes could be the gape angle and macro and microscopic skin features which  
345 remains to be investigated.

346 **References**

- 347 1. Webb, P. W. Simple physical principles and vertebrate aquatic locomotion. *Integr.*  
348 *Comp. Biol.* **28**, 709–725 (1988).
- 349 2. Vogel, S. *Life In Moving Fluids: The Physical Biology Of Flow*. (Princeton  
350 University Press, 1994).
- 351 3. Hoerner, S. F. *Fluid Dynamic Drag*. (Hoerner Fluid Dynamics, 1965).
- 352 4. Godoy-Diana, R. & Thiria, B. On the diverse roles of fluid dynamic drag in animal  
353 swimming and flying. *J. R. Soc. Interface* **15**, 20170715 (2018).
- 354 5. Daniel, T. L. Unsteady aspects of aquatic locomotion. *Am. Zool.* **24**, 121–134  
355 (1984).
- 356 6. Brennen, C. E. A review of added mass and fluid inertial forces. (1982).
- 357 7. Bilcke, J., Herrel, A. & Aerts, P. Effect of prey and predator size on the capture  
358 success of an aquatic snake. *Belgian J. Zool.* **137**, 191–195 (2007).
- 359 8. Kelley, N. P. & Motani, R. Trophic convergence drives morphological convergence  
360 in marine tetrapods. *Biol. Lett.* **11**, 5 (2015).
- 361 9. Howell, A. B. *Aquatic Mammals*. (Dover Publications Inc, 1971).
- 362 10. Winemiller, K. O., Kelso-Winemiller, L. C. & Brenkert, A. L. Ecomorphological  
363 diversification and convergence in fluvial cichlid fishes. *Environ. Biol. Fishes* **44**,  
364 235–261 (1995).
- 365 11. Van Wassenbergh, S. *et al.* Hydrodynamic constraints on prey-capture performance  
366 in forward-striking snakes. *J. R. Soc. Interface* **7**, 773–785 (2010).
- 367 12. Stayton, C. T. Biomechanics on the half shell: Functional performance influences  
368 patterns of morphological variation in the emydid turtle carapace. *Zoology* **114**,  
369 213–223 (2011).
- 370 13. Young, B. A. The influences of the aquatic medium on the prey capture system of  
371 snakes. *J. Nat. Hist.* **25**, 519–531 (1991).
- 372 14. Herrel, A. *et al.* Morphological convergence as a consequence of extreme functional

- 373 demands: examples from the feeding system of natricine snakes. *J. Evol. Biol.* **21**,  
374 1438–1448 (2008).
- 375 15. Hibbitts, T. J. & Fitzgerald, L. A. Morphological and ecological convergence in two  
376 natricine snakes. *Biol. J. Linn. Soc.* **85**, 363–371 (2005).
- 377 16. Segall, M., Cornette, R., Fabre, A.-C., Godoy-Diana, R. & Herrel, A. Does aquatic  
378 foraging impact head shape evolution in snakes ? *Proc. R. Soc. London, B Biol. Sci.*  
379 **283**, (2016).
- 380 17. Webb, P. W. Body form, locomotion and foraging in aquatic vertebrates. *Am. Zool.*  
381 **24**, 107–120 (1984).
- 382 18. Esquerré, D. & Keogh, J. S. Parallel selective pressures drive convergent  
383 diversification of phenotypes in pythons and boas. *Ecol. Lett.* **19**, 800–809 (2016).
- 384 19. Vincent, S. E., Brandley, M. C., Herrel, A. & Alfaro, M. E. Convergence in trophic  
385 morphology and feeding performance among piscivorous natricine snakes. *J. Evol.*  
386 *Biol.* **22**, 1203–1211 (2009).
- 387 20. Fabre, A.-C., Bickford, D., Segall, M. & Herrel, A. The impact of diet, habitat use,  
388 and behavior on head shape evolution in homalopsid snakes. *Biol. J. Linn. Soc.* **118**,  
389 634–647 (2016).
- 390 21. van Netten, S. M. Hydrodynamic detection by cupulae in a lateral line canal:  
391 functional relations between physics and physiology. *Biol. Cybern.* **94**, 67–85  
392 (2006).
- 393 22. McHenry, M. J., Feitl, K. E., Strother, J. A. & Van Trump, W. J. Larval zebrafish  
394 rapidly sense the water flow of a predator's strike. *Biol. Lett.* **5**, 477–9 (2009).
- 395 23. Thiria, B., Goujon-Durand, S. & Wesfreid, J. E. The wake of a cylinder performing  
396 rotary oscillations. *J. Fluid Mech.* **560**, 123–147 (2006).
- 397 24. Saffman, P. G. *Vortex Dynamics*. (Cambridge University Press, 1992).
- 398 25. Ringuette, M. J., Milano, M. & Gharib, M. Role of the tip vortex in the force  
399 generation of low-aspect-ratio normal flat plates. *J. Fluid Mech.* **581**, 453 (2007).
- 400 26. Bilcke, J., Herrel, A. & Van Damme, R. Correlated evolution of aquatic prey-



- 401 capture strategies in European and American natricine snakes. *Biol. J. Linn. Soc.* **88**,  
402 73–83 (2006).
- 403 27. Vincent, S. E., Herrel, A. & Irschick, D. J. Comparisons of aquatic versus terrestrial  
404 predatory strikes in the pitviper, *Agkistrodon piscivorus*. *J. Exp. Zool. Part A Comp.*  
405 *Exp. Biol.* **303**, 476–488 (2005).
- 406 28. Radford, C. A., Montgomery, J. C., Caiger, P. & Higgs, D. M. Pressure and particle  
407 motion detection thresholds in fish: a re-examination of salient auditory cues in  
408 teleosts. *J. Exp. Biol.* **215**, 3429–3435 (2012).
- 409 29. Kastelein, R. A. *et al.* Startle response of captive North Sea fish species to  
410 underwater tones between 0.1 and 64 kHz. *Mar. Environ. Res.* **65**, 369–377 (2008).
- 411 30. Moisy, F. A PIV Post-processing and data analysis toolbox : PIVMat 4.00 27 Apr  
412 2006 (Updated 26 Apr 2016). (2006).
- 413 31. R Development Core Team. *R: A language and environment for statistical*  
414 *computing*. (2014).
- 415 32. Catania, K. C. Tentacled snakes turn C-starts to their advantage and predict future  
416 prey behavior. *Proc. Natl. Acad. Sci. U. S. A.* **106**, 11183–7 (2009).
- 417 33. Alfaro, M. E. Forward attack modes of aquatic feeding garter snakes. *Funct. Ecol.*  
418 **16**, 204–215 (2002).
- 419 34. Voris, H. K., Voris, H. H. & Liat, L. B. The food and feeding behavior of a marine  
420 snake, *Enhydrina schistosa* (Hydrophiidae). **1978**, 134–146 (1978).

#### 421 **Acknowledgments**

422 We thank Olivier Brouard, Amaury Fourgeaud and Tahar Amorri from the PMMH  
423 lab for their precious help in the experimental design as well as Xavier Benoit-Gonin for his  
424 help with the 3D printer. Thierry Darnige and especially Justine Laurent are acknowledged  
425 for their help with the sensors and computer coding. MS thanks the Région Ile de France for  
426 funding this research project and the doctoral school Frontières du Vivant (FdV) –  
427 Programme Bettencourt.

#### 428 **Author contributions**

429 All authors helped revise and approved the manuscript and conceived the study. MS carried  
430 out the data collection, the statistical analyses, and wrote the manuscript. RGD helped to  
431 build the experimental setup and to interpret the data. RGD carried out the particle image  
432 velocimetry analysis. AH participated in the scientific interpretation of the data in a  
433 biological context.

#### 434 **Competing interests**

435 We have no competing interests.

#### 436 **Data availability**

437 See Supplementary Table S5

#### 438 **Figure legends**

439 **Figure 1:** 3D models of the head shape of non-aquatic (left) versus aquatic snakes (right) in  
440 front, side and top view.

441 **Figure 2: a.** Experimental setup used to simulate a frontal attack of a snake towards a prey.  
442 **b.** Example of the output of the force sensor 1 (red line), force sensor 2 (green dashed line)  
443 and velocity (blue line) during one trial (i.e. one strike). The plateau and peak force used to  
444 calculate the hydrodynamic forces are indicated.

445 **Figure 3:** Drag term  $2F_d/\rho S$  depending on the velocity term of the strike ( $U^2$ ) for the two  
446 head models tested. Linear regression lines are drawn. The slopes correspond to the drag  
447 coefficient of each shape and the  $R^2$  are the regression coefficients. Squares: non-aquatic  
448 model, circles: aquatic model.

449 **Figure 4:** Normalized inertial force term  $(F_i - ma)/\rho V$  depending on the acceleration of the  
450 strike ( $a$  in  $m.s^{-2}$ ) for the two head models tested. Linear regression lines are drawn. The  
451 slopes correspond to the added mass coefficient of each shape and the  $R^2$  are the regression  
452 coefficients. Squares: non-aquatic model, circles: aquatic model.

453 **Figure 5: a.** Zoom on the prey sensor output highlighting the method used to determine the  
454 detection distance, using the 1sd (standard deviation) threshold (not at scale here). **b.**  
455 Distance (cm) at which the prey could potentially detect the snake depending on the maximal  
456 velocity of the strike ( $m.s^{-1}$ ). For each graph: squares: non-aquatic model, circles: aquatic  
457 model.

458 **Figure 6: a.** Snapshots of the vorticity field  $\omega_z$  around the snake head models at the end of  
459 the acceleration phase for the aquatic (first line) and non-aquatic (second line) models, in the  
460 three measurement planes: bottom, jaw and skull views are shown on the first to third  
461 columns, respectively. The color bar for the vorticity field is given in  $s^{-1}$ . **b.** Evolution of  
462 the dimensionless integrated positive circulation during the acceleration phase depending on  
463 the time for both models in each of the three views considered.
